# Supplementary material for: Molecular ruler mechanism and interfacial catalysis of the integral membrane acyltransferase PatA
Source: PubMed Central journal article supplement — Sci Adv. 2021 Oct 15;7(42):eabj4565. doi: 10.1126/sciadv.abj4565 (PMC8519569; doi:10.1126/sciadv.abj4565), 2021-10-15
Supplement: sciadv.abj4565_sm.pdf [file sciadv.abj4565_sm.pdf]

## Supplementary Materials for

### **Molecular ruler mechanism and interfacial catalysis of the integral membrane acyltransferase PatA**

Itxaso Anso, Luis G. M. Basso, Lei Wang, Alberto Marina, Edgar D. Páez-Pérez, Christian Jäger, Floriane Gavotto, Montse Tera, Sebastián Perrone, F.-Xabier Contreras, Jacques Prandi, Martine Gilleron, Carole L. Linster, Francisco Corzana, Todd L. Lowary, Beatriz Trastoy\*, Marcelo E. Guerin\*

\*Corresponding author. Email: [beatriz.trastoy@gmail.com](mailto:beatriz.trastoy@gmail.com) (B.T.); [mrcguerin@gmail.com](mailto:mrcguerin@gmail.com) (M.E.G.)

Published 15 October 2021, *Sci. Adv.* **7**, eabj4565 (2021)  
DOI: [10.1126/sciadv.abj4565](https://doi.org/10.1126/sciadv.abj4565)

#### **This PDF file includes:**

Supplementary Methods  
Figs. S1 to S9  
Tables S1 to S5

## 1. SUPPLEMENTARY METHODS

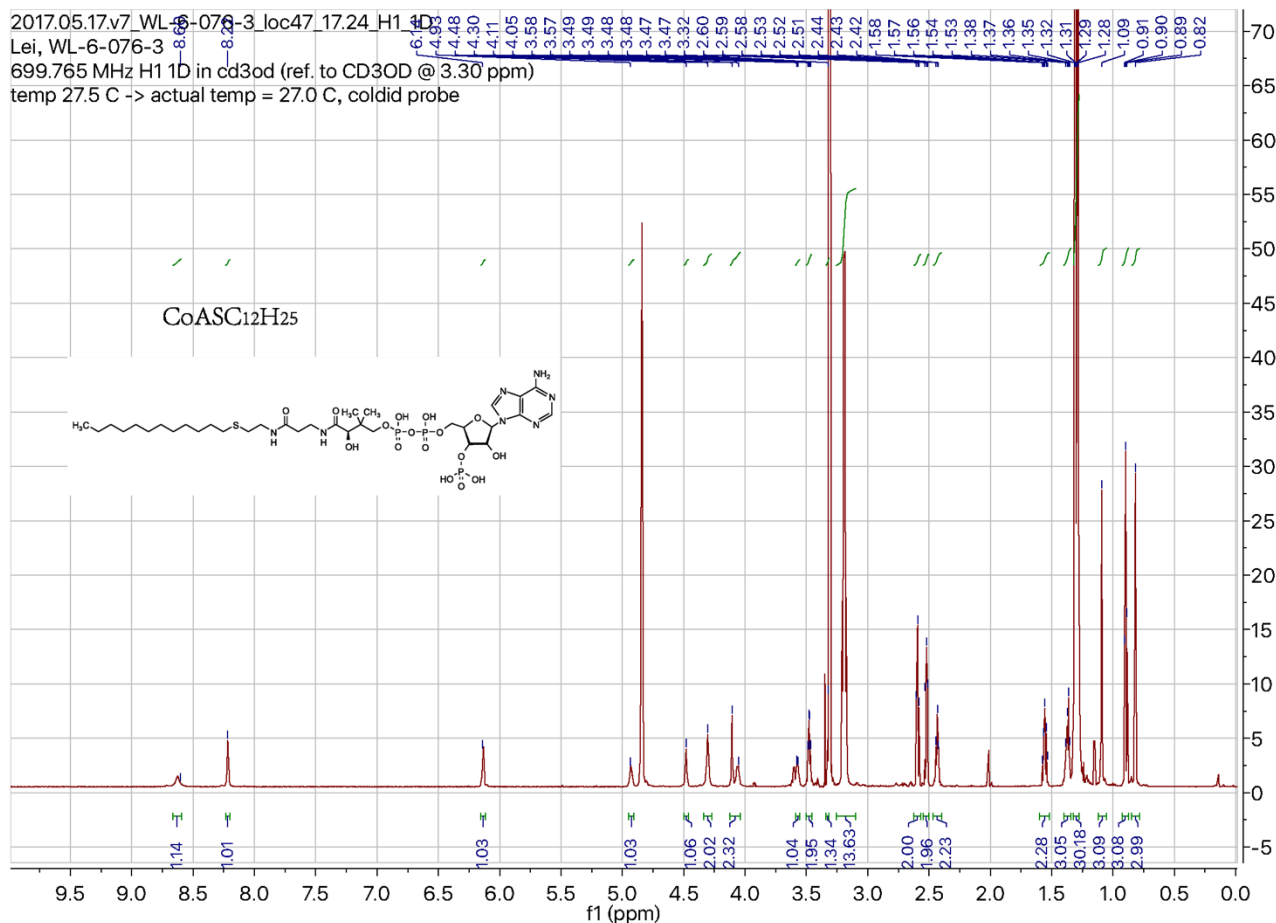

**Data for S-C12-CoA product:** (11 mg product from 60 mg CoA, 11% yield). <sup>1</sup>H NMR (700 MHz, CD<sub>3</sub>OD, δ<sub>H</sub>) 8.63 (s, 1 H), 8.22 (s, 1 H), 6.14 (d, 1 H, J = 6.0 Hz), 4.93 (brs, 1 H), 4.83-4.80 (m, 1 H), 4.48 (s, 1 H), 4.30 (brs, 2 H), 4.10 (s, 1 H), 4.06 (d, 1 H, J = 10.5 Hz), 3.57 (d, 1 H, J = 9.5 Hz), 3.48 (td, 2 H, J = 7.0, 2.0 Hz), 3.32 (t, 3 H, J = 7.2 Hz), 3.19 (q, 16 H, J = 6.7 Hz), 2.59 (t, 2 H, J = 7.2 Hz), 2.52 (t, 2 H, J = 7.2 Hz), 2.43 (td, 2 H, J = 7.2, 1.5 Hz), 1.57-1.53 (m, 2 H), 1.39-1.27 (m, 18 H), 1.31 (t, 3 H, J = 6.7 Hz), 1.09 (s, 3 H), 0.90 (t, 3 H, J = 7.2 Hz), 0.82 (s, 3 H). HRMS (ESI) calcd for (M-2H)<sub>-2</sub> C<sub>33</sub>H<sub>58</sub>N<sub>7</sub>O<sub>16</sub>P<sub>3</sub>S: 466.6442. Found: 466.6433.

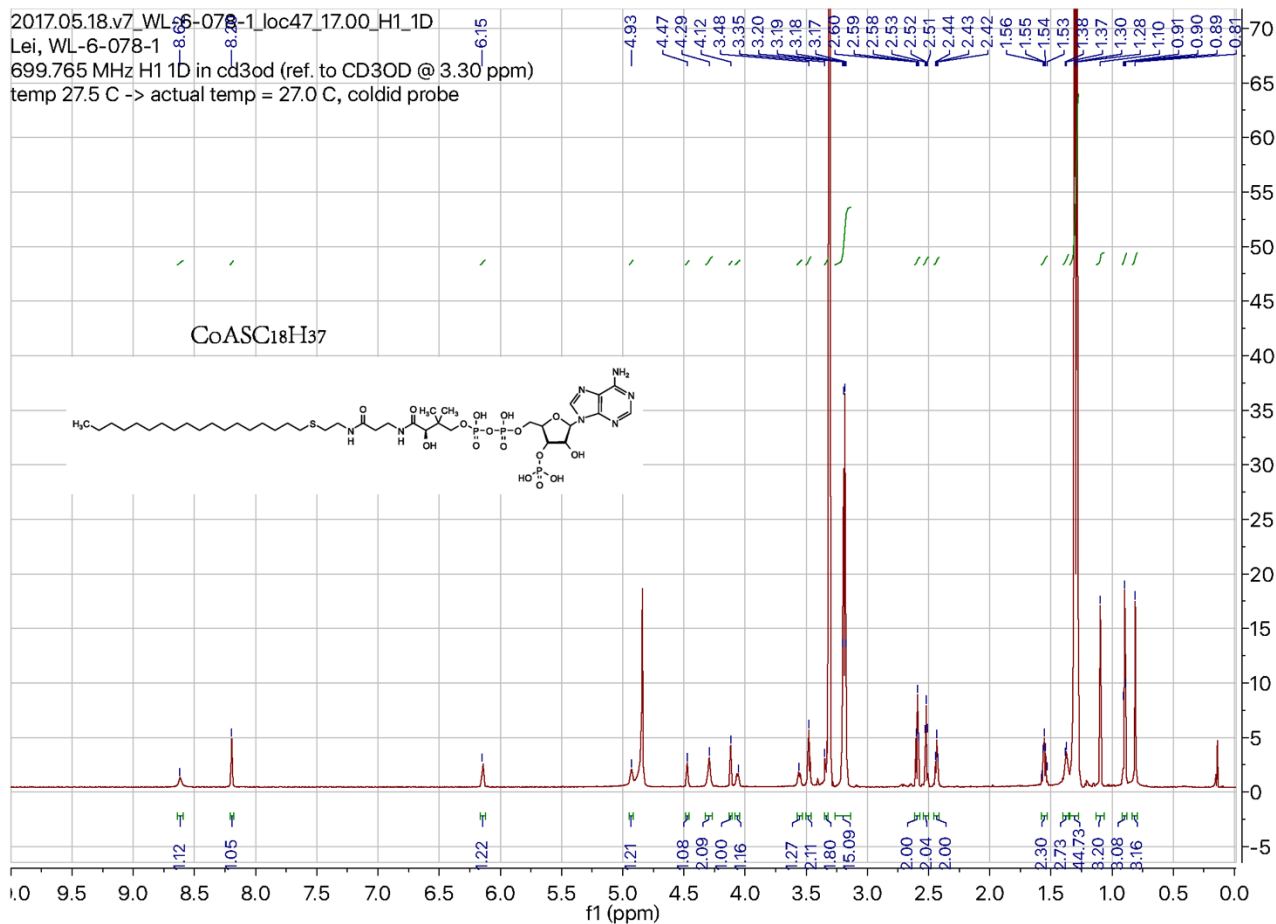

**Data for S-C18-CoA product:** (10 mg product from 60 mg CoA, 12% yield). <sup>1</sup>H NMR (700 MHz, CD<sub>3</sub>OD, δ<sub>H</sub>) 8.63 (s, 1 H), 8.20 (s, 1 H), 6.14 (d, 1 H, J = 6.0 Hz), 4.93 (brs, 1 H), 4.88 (brs, 1 H), 4.47 (s, 1 H), 4.29 (brs, 2 H), 4.12 (s, 1 H), 4.06 (d, 1 H, J = 9.0 Hz), 3.56 (d, 1 H, J = 8.5 Hz), 3.49 (t, 2 H, J = 7.0 Hz), 3.32 (t, 3 H, J = 7.2 Hz), 3.19 (q, 16 H, J = 6.7 Hz), 2.59 (t, 2 H, J = 7.2 Hz), 2.52 (t, 2 H, J = 7.2 Hz), 2.43 (t, 2 H, J = 7.2 Hz), 1.57-1.53 (m, 2 H), 1.39-1.27 (m, 18 H), 1.31 (t, 3 H, J = 6.7 Hz), 1.09 (s, 3 H), 0.90 (t, 3 H, J = 7.2 Hz), 0.82 (s, 3 H). HRMS (ESI) calcd for (M-2H)-<sub>2</sub> C<sub>39</sub>H<sub>70</sub>N<sub>7</sub>O<sub>16</sub>P<sub>3</sub>S: 508.6912. Found: 508.6903.

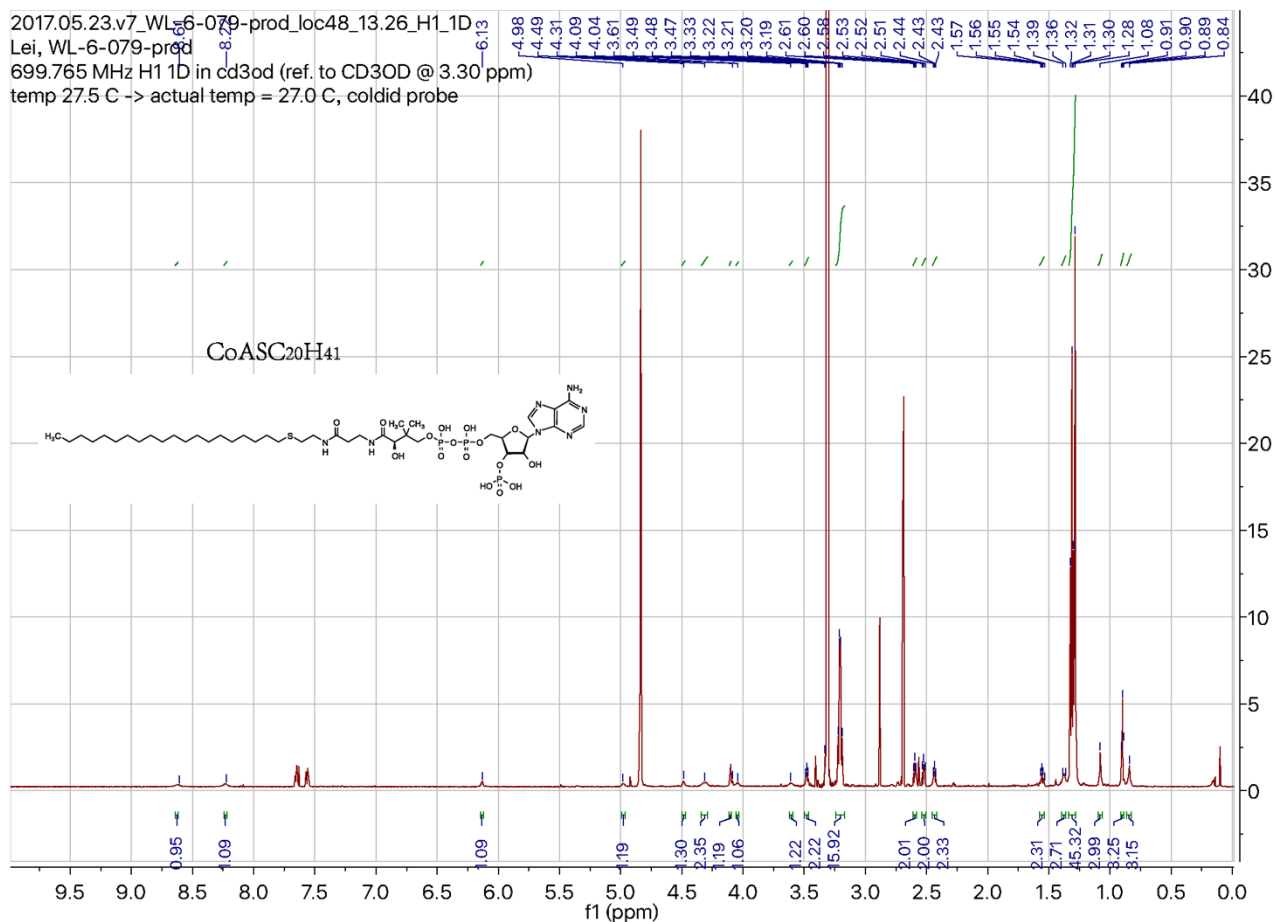

**Data for S-C20-CoA product:** (2 mg product from 60 mg CoA, 2.4% yield). <sup>1</sup>H NMR (700 MHz, CD<sub>3</sub>OD, δ<sub>H</sub>) 8.62 (s, 1 H), 8.23 (s, 1 H), 6.13 (d, 1 H, J = 6.0 Hz), 4.98 (brs, 1 H), 4.84 (brs, 1 H), 4.49 (s, 1 H), 4.31 (brs, 2 H), 4.10 (s, 1 H), 4.05 (d, 1 H, J = 9.0 Hz), 3.61 (d, 1 H, J = 8.5 Hz), 3.48 (t, 2 H, J = 7.0 Hz), 3.32 (t, 3 H, J = 7.2 Hz), 3.19 (q, 16 H, J = 6.7 Hz), 2.59 (t, 2 H, J = 7.2 Hz), 2.52 (t, 2 H, J = 7.2 Hz), 2.43 (t, 2 H, J = 7.2 Hz), 1.57-1.53 (m, 2 H), 1.39-1.27 (m, 18 H), 1.31 (t, 3 H, J = 6.7 Hz), 1.09 (s, 3 H), 0.90 (t, 3 H, J = 7.2 Hz), 0.82 (s, 3 H). HRMS (ESI) calcd for M-2H)<sub>2</sub> C<sub>41</sub>H<sub>74</sub>N<sub>7</sub>O<sub>16</sub>P<sub>3</sub>S: 522.7068. Found: 522.7061.

## Supplementary Figures

**A**

```
MVTLSGRIPLGGQVTDLGYAAGWRLVRAMPEAMAQGVFGAGARYAARN
GGPEQLRRNRLARVVGKPPADVPDDLIRASLASARYWREAFRLPAMDH
GRLGEQLDVIDIDHLWSALDAGRGAVLALPHSGNWD MAGVWLVQNYGP
FTTVAERLKPESLYRRFVEYRESLGFVLP LTTGGERPPFEVLAERLTD
NRPICLMAERDLTRSGVQVDFDFGEATRMPAGPAKLAIETGAALFPVHC
WFEGDGWGMRVPELDTSSGDVTAITQALADRFAANIATYPADWHMLQ
PQWIADLSDERRARLGTSRHHHHHH
```

**B**

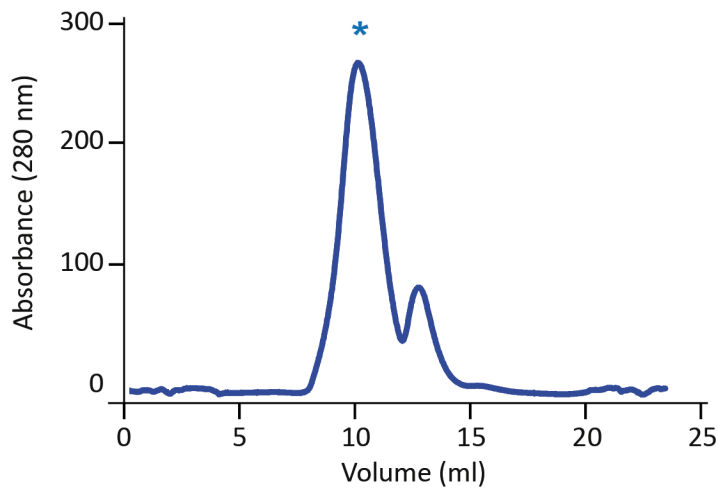

**C**

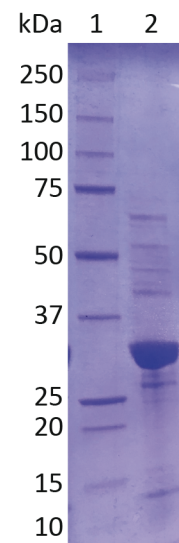

**Fig. S1. Recombinant production of full length PatA from *M. smegmatis*.** (A) The recombinant full length PatA construct is highlighted in yellow. Catalytic residues are highlighted in green and his-tag in orange. (B) Superdex 200 Increase 10/300 GL profile showing the purified full length PatA. (C) SDS-PAGE showing the purified full length PatA. The sample was run in one gel.

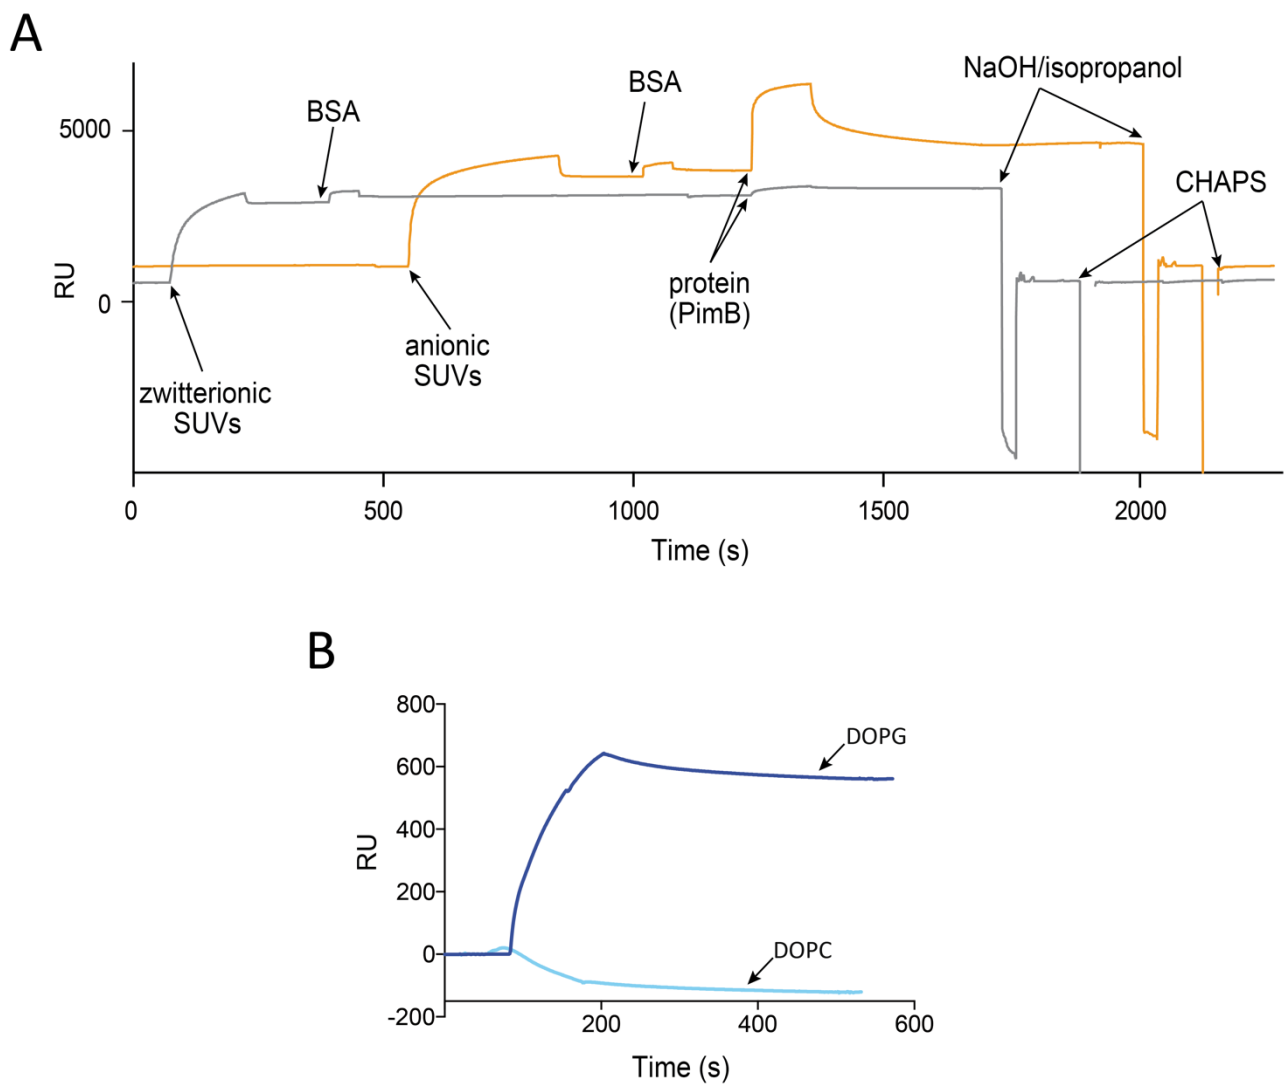

**Fig. S2. SPR binding experiments of PatA and SUVs. (A) Sensograms of flow cell 1 (Fc1; grey) and flow cell 2 (Fc2; orange) chip surfaces, highlighting the lipid capture (injection of zwitterionic and anionic SUVs, respectively), binding interaction (protein association and dissociation events) and regeneration (injection of NaOH/Isopropanol and the detergent CHAPS) steps. (B) SPR sensograms of 4.5  $\mu$ M of PatA showing no binding with DOPC-SUVs (light blue) and binding event with DOPG-SUVs (dark blue).**

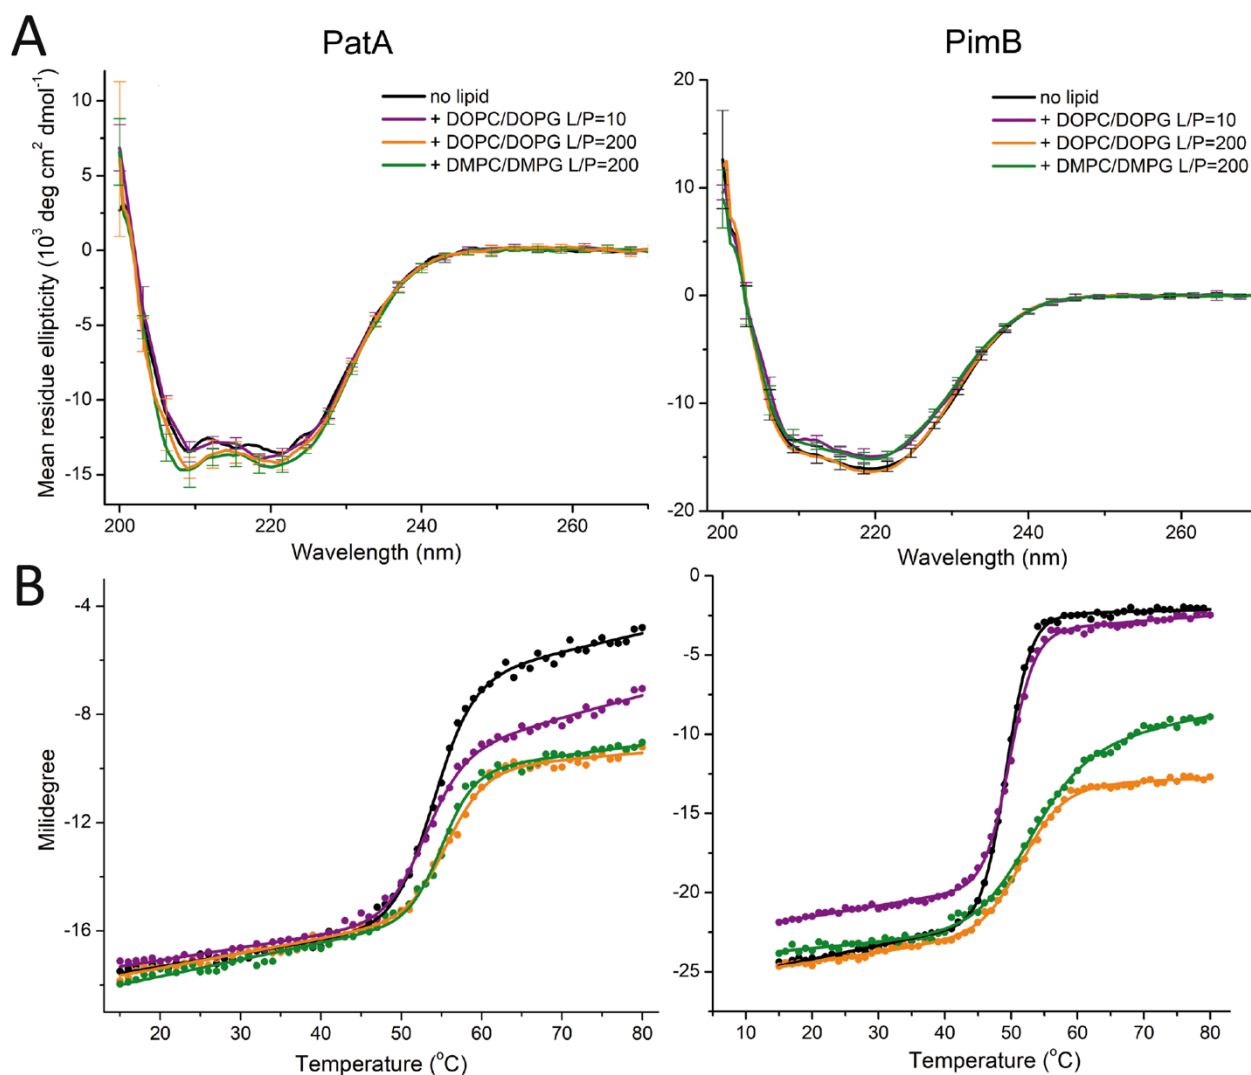

**Fig. S3. Secondary structure and thermal stability of PatA and PimB in the presence of lipids.** (A) Far-UV CD spectra recorded at 20 °C and (B) ellipticity at 222 nm as a function of temperature for PatA (left) and PimB (right) in the absence and presence of DOPC/DOPG 40:60 SUVs and DMPC/DMPG 40:60 SUVs at the lipid-to-protein ratios (L/P) indicated. Solid lines are best fits to the CD data using a two-state equilibrium model. The thermodynamic parameters of the protein unfolding transition are summarized in the Supplementary Table S1.

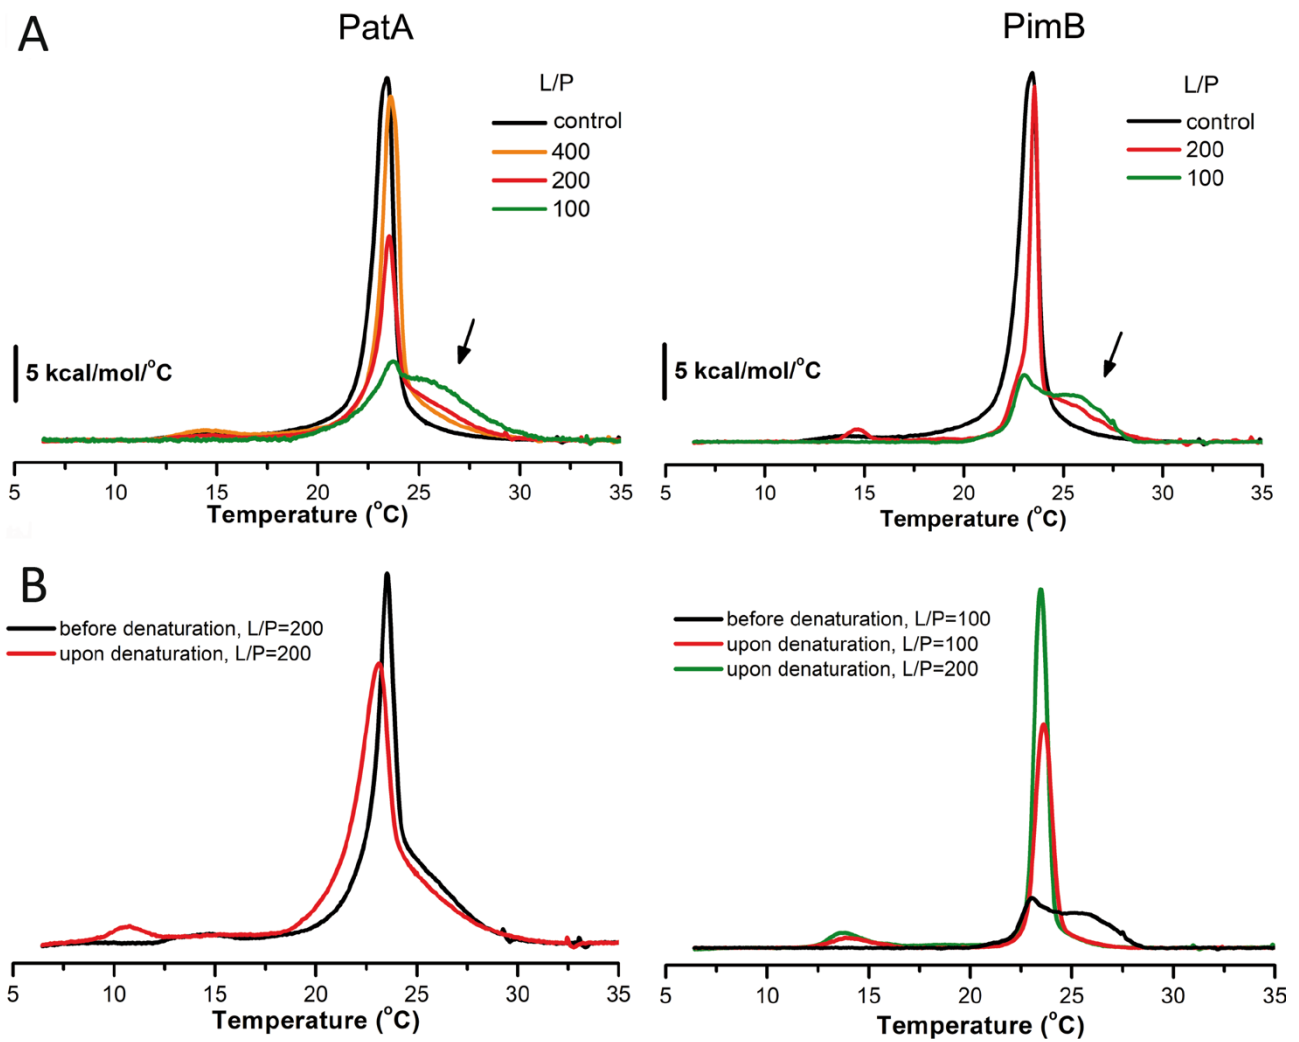

**Fig. S4. Effect of the enzymes in the thermodynamics of lipid phase transitions of DMPC/DMPC 40:60 (mol/mol) LUVs. (A) Excess heat capacity profiles of the lipid vesicles in the absence (black) and presence of PatA (left) and PimB (right) at the lipid-to-protein molar ratio (L/P) indicated. (B) DSC thermograms of the PatA-associated (left) and PimB-associated (right) LUVs recorded before and after protein denaturation.**



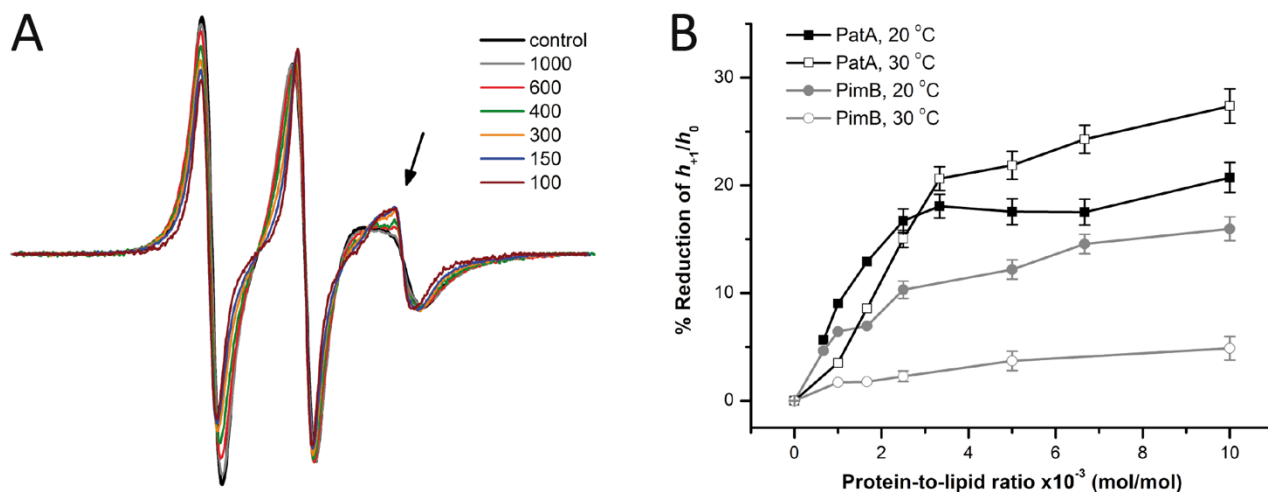

**Fig. S5. PatA changes the structural dynamics of DMPG headgroup region more effectively than PimB.** (A) DPPTC ESR spectra acquired at 30 °C in the absence (black line) and presence of PatA at different lipid-to-protein molar ratios (colored lines). The arrow indicates a sharp component. The spectra were normalized by the height of the middle line ( $h_0$ ). Spectral width is 100 Gauss. (B) Percentage reduction of the ratio between the intensity of the low ( $h_{+1}$ ) and the central ( $h_0$ ) field lines as a function of the PimB- or PatA-to-lipid molar ratio determined from the DPPTC spectra acquired at the gel (20 °C) and fluid (30 °C) phases of DMPG-SUVs.

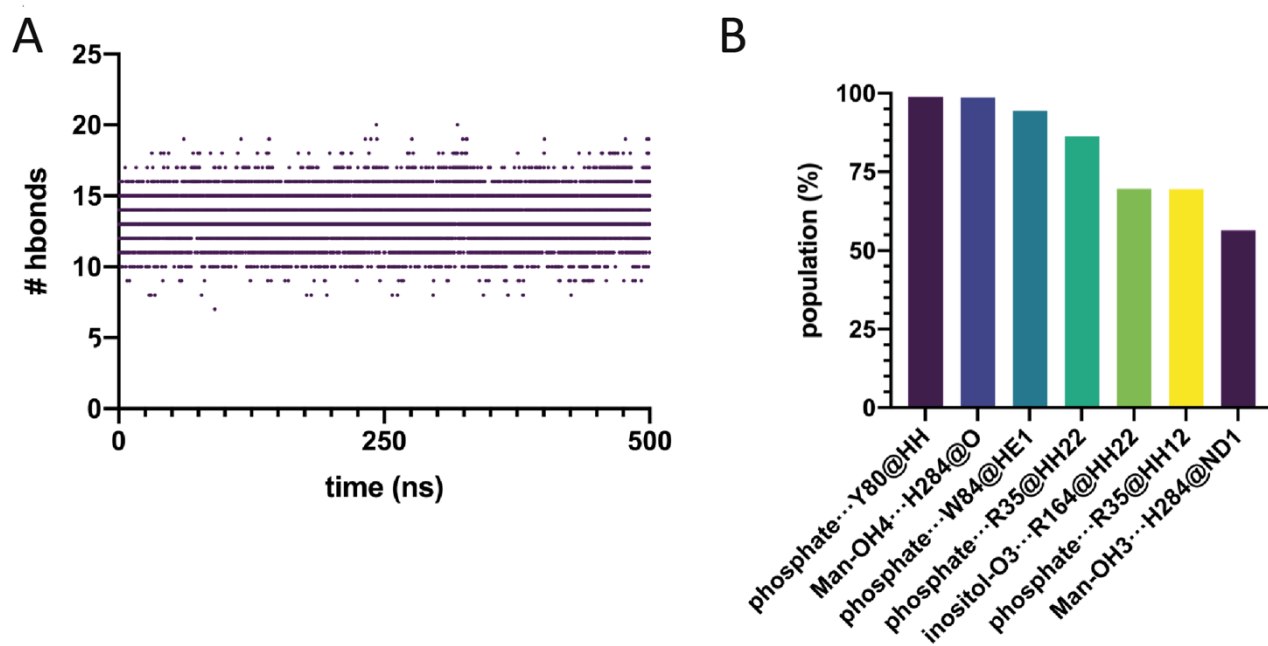

**Fig. S6. MD simulations on Ac<sub>1</sub>PIM<sub>2</sub>/PatA complex embedded in one leaflet of the bilayer. (A)** Number of hydrogen bonds found between PatA and the membrane derived from 0.5  $\mu$ s MD simulations. **(B)** Population (%) of the hydrogen bonds formed between PatA and the PIM<sub>2</sub> glycolipid throughout the MD simulations. The AMBER force field nomenclature was used for the amino acids.

**A** PIM<sub>2</sub>-Pal2-C12 ([M-H]<sup>-</sup> exact mass: *m/z* 1315.7913)

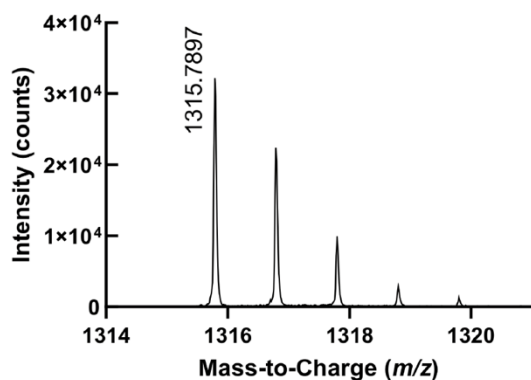

**B** PIM<sub>2</sub>-Pal2-C14 ([M-H]<sup>-</sup> exact mass: *m/z* 1343.8226)

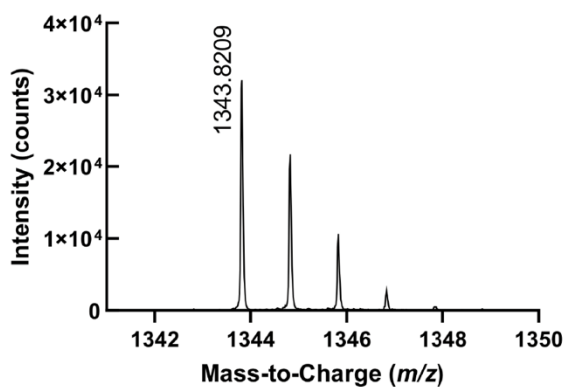

**C** PIM<sub>2</sub>-Pal2-C16 ([M-H]<sup>-</sup> exact mass: *m/z* 1371.8539)

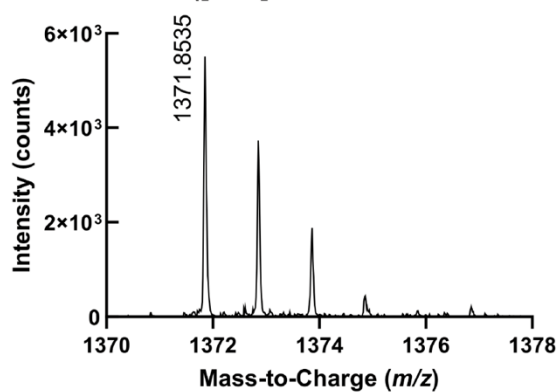

**Fig. S7. Representative mass spectra of the deprotonated molecules.** (A) PIM<sub>2</sub>-Pal2-C12 ([M-H]<sup>-</sup>), (B) PIM<sub>2</sub>-Pal2-C14 ([M-H]<sup>-</sup>) and (C) PIM<sub>2</sub>-Pal2-C16 ([M-H]<sup>-</sup>).

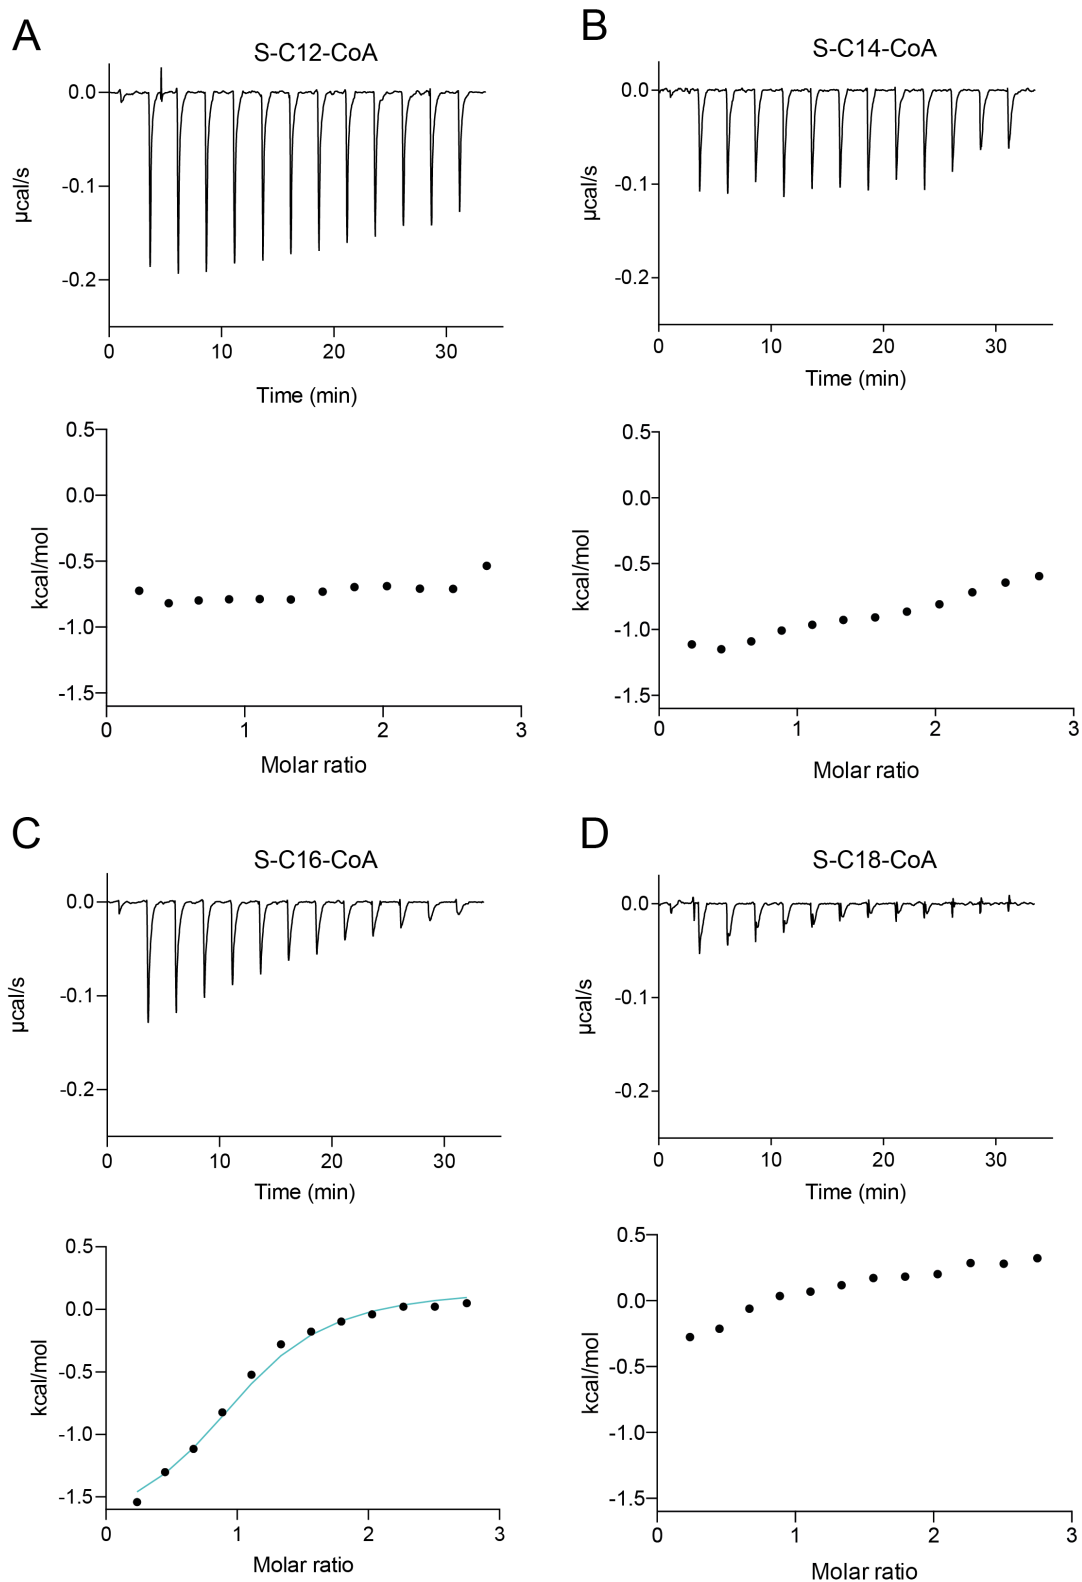

**Fig. S8. Acyl chain length binding experiments by ITC.** ITC raw and integrated data for PatA and non-hydrolysable acyl-CoA derivatives (A) S-C12-CoA (B) S-C14-CoA (C) S-C16-CoA and (D) S-C18-CoA. The experimental points are represented as filled squares and the best fit of these points to a one-site binding model is represented as a solid curve for S-C16-CoA experiment.

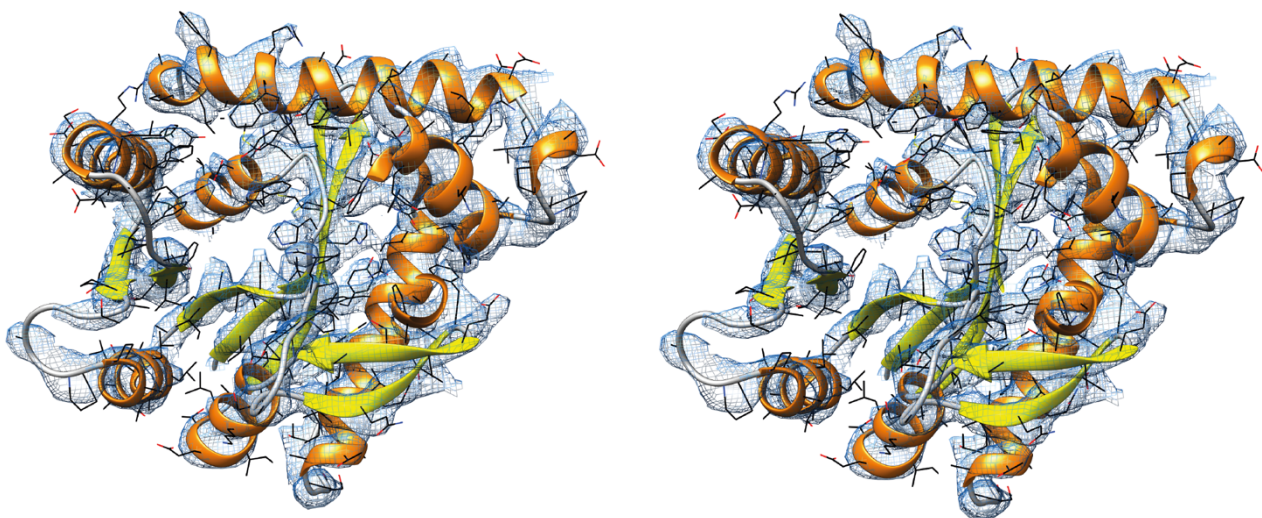

**Fig. S9. Electron density map of the refined full length PatA.** Stereo view of the final electron density maps (2mFo-DFc contoured at  $1\sigma$ ) corresponding to the full length PatA structure.

## Supplementary Tables

**Table S1. Thermodynamic parameters of protein unfolding by CD spectroscopy.** The melting temperature ( $T_m$ ) and the apparent enthalpy change ( $\Delta H_{app}$ ) for PatA and PimB in the absence and presence of lipids were determined by fitting the CD data to a simple, two-state equilibrium between folded and unfolded states without heat capacity changes, taking into account the pre- and post-transition linear changes in ellipticity as a function of temperature (ref. 40 from main text). The apparent entropy change ( $\Delta S_{app}$ ) of the unfolding transition was calculated as  $\Delta S_{app} = \Delta H_{app} / T_m$ , since  $\Delta G = 0$  at  $T_m$ .

| Sample      | L/P | $T_m$ (°C)     | $\Delta H_{app}$<br>(kcal/mol) | $\Delta S_{app}$<br>(cal/mol.K) |
|-------------|-----|----------------|--------------------------------|---------------------------------|
| <b>PatA</b> |     |                |                                |                                 |
| No lipid    | –   | $54.0 \pm 0.2$ | $86 \pm 4$                     | $264 \pm 12$                    |
| DOPC/DOPG   | 10  | $52.9 \pm 0.2$ | $86 \pm 5$                     | $263 \pm 15$                    |
| DOPC/DOPG   | 200 | $55.8 \pm 0.2$ | $97 \pm 7$                     | $293 \pm 20$                    |
| DMPC/DMPG   | 200 | $55.1 \pm 0.2$ | $105 \pm 7$                    | $320 \pm 22$                    |
| <b>PimB</b> |     |                |                                |                                 |
| No lipid    | –   | $49.3 \pm 0.1$ | $114 \pm 3$                    | $355 \pm 8$                     |
| DOPC/DOPG   | 10  | $49.8 \pm 0.1$ | $110 \pm 3$                    | $340 \pm 9$                     |
| DOPC/DOPG   | 200 | $51.9 \pm 0.2$ | $67 \pm 3$                     | $206 \pm 8$                     |
| DMPC/DMPG   | 200 | $52.7 \pm 0.4$ | $50 \pm 4$                     | $153 \pm 9$                     |

**Table S2. Thermodynamic parameters associated to the DMPC/DMPG 40:60 (mol/mol) LUVs phase transitions in the presence of PatA and PimB at different lipid-to-protein (L/P) ratios.**  $T_p$  and  $T_m$  are, respectively, the temperatures of the pretransition and the gel-to-liquid crystalline phase transition of the lipid samples. In the two-component thermograms of the protein-containing samples, the  $T_m$  represents the temperature where the curve reaches its maximum value. The calorimetric enthalpy change,  $\Delta H_{cal}$ , was calculated as the area under the whole heat capacity curve.  $\Delta T_{1/2}$  corresponds to the linewidth at half height of the main, more intense peak. The second scan of the protein-containing samples corresponds to the thermogram recorded after protein denaturation.

| Sample                | L/P | $T_p$ (°C) | $T_m$ (°C) | $\Delta H_{cal}$<br>(kcal/mol) | $\Delta T_{1/2}$<br>(°C) |
|-----------------------|-----|------------|------------|--------------------------------|--------------------------|
| <b><u>Control</u></b> |     |            |            |                                |                          |
| scan #1               | –   | 14.1       | 23.4       | $5.5 \pm 0.1$                  | 1.1                      |
| scan #2               | –   | 14.1       | 23.5       | $5.3 \pm 0.2$                  | 1.1                      |
| <b>+ <u>PatA</u></b>  |     |            |            |                                |                          |
| scan #1               | 400 | 14.4       | 23.6       | $5.4 \pm 0.1$                  | 1.0                      |
| scan #2               | 400 | 11.6       | 23.6       | $5.3 \pm 0.2$                  | 1.4                      |
| scan #1               | 200 | 14.7       | 23.5       | $4.0 \pm 0.2$                  | 1.0                      |
| scan #2               | 200 | 10.6       | 23.1       | $4.5 \pm 0.3$                  | 1.8                      |
| scan #1               | 100 | –          | 23.7       | $3.4 \pm 0.3$                  | 4.6                      |
| scan #2               | 100 | –          | 23.8       | $2.3 \pm 0.6$                  | 5.6                      |
| <b>+ <u>PimB</u></b>  |     |            |            |                                |                          |
| scan #1               | 200 | 14.6       | 23.6       | $3.6 \pm 0.2$                  | 0.5                      |
| scan #2               | 200 | 13.8       | 23.5       | $4.4 \pm 0.3$                  | 0.8                      |
| scan #1               | 100 | –          | 23.0       | $2.2 \pm 0.4$                  | 4.2                      |
| scan #2               | 100 | 14.1       | 23.6       | $3.3 \pm 0.4$                  | 1.0                      |

Uncertainties:  $T_p$  ( $\pm 0.4$  °C),  $T_m$  ( $\pm 0.1$ – $0.3$  °C),  $\Delta T_{1/2}$  ( $\pm 0.2$ – $0.4$  °C)

**Table S3. Summary of the best-fit NLLS parameters obtained from the simulations of the DPPTC ESR spectra.** Best-fit rotational diffusion rate perpendicular to the lipid axis ( $R_{\perp}$ ), rotational correlation time ( $\tau$ ), order parameters ( $S_0$ ,  $S_2$ ), and  $A_{zz}$  component obtained from NLLS simulations of the DPPTC ESR spectra in DMPC/DMPG 40:60 (mol/mol) SUVs at 30 °C in the absence and presence of PatA and PimB at different lipid-to-protein molar ratios (L/P).

| System  | L/P      | comp     | $R_{\perp}$ ( $\times 10^7$ s $^{-1}$ ) | $\tau$ (ns) | $S_0$ | $S_2$  | $A_{zz}$ (G) |
|---------|----------|----------|-----------------------------------------|-------------|-------|--------|--------------|
| control | –        | 1        | 3.72                                    | 2.27        | 0.430 | -0.091 | 35.0         |
| + PatA  | 1000     | 1        | 4.07                                    | 2.24        | 0.482 | -0.098 | 35.2         |
|         |          | (99.2%)  |                                         |             |       |        |              |
|         | 600      | 2 (0.8%) | 23.9                                    | 0.32        | 0.128 | –      | 37.9         |
|         |          | 1        | 4.79                                    | 2.01        | 0.477 | -0.085 | 35.8         |
|         |          | (97.2%)  |                                         |             |       |        |              |
|         |          | 2 (2.8%) | 23.9                                    | 0.32        | 0.128 | –      | 37.9         |
|         | 400      | 1        | 5.13                                    | 1.92        | 0.391 | -0.019 | 36.3         |
|         |          | (94.8%)  |                                         |             |       |        |              |
|         |          | 2 (5.2%) | 23.9                                    | 0.32        | 0.128 | –      | 37.9         |
|         |          | 1        | 6.76                                    | 1.43        | 0.324 | 0.046  | 37.0         |
|         | 300      | (92.0%)  |                                         |             |       |        |              |
|         |          | 2 (8.0%) | 23.4                                    | 0.33        | 0.128 | –      | 37.9         |
|         | 200      | 1        | 7.08                                    | 1.35        | 0.310 | 0.047  | 37.1         |
|         |          | (91.0%)  |                                         |             |       |        |              |
|         | 2 (9.0%) | 22.4     | 0.33                                    | 0.128       | –     | 37.9   |              |
|         | 1        | 7.24     | 1.12                                    | 0.226       | 0.124 | 37.3   |              |
| 150     | (86.8%)  |          |                                         |             |       |        |              |
|         | 2        | 20.4     | 0.36                                    | 0.128       | –     | 37.9   |              |
| 100     | (13.2%)  |          |                                         |             |       |        |              |
|         | 1        | 7.41     | 1.08                                    | 0.160       | 0.160 | 37.3   |              |
|         | (77.2%)  |          |                                         |             |       |        |              |
|         | 2        | 25.1     | 0.41                                    | 0.128       | –     | 37.9   |              |
|         | (22.8%)  |          |                                         |             |       |        |              |
|         |          |          |                                         |             |       |        |              |
| + PimB  | 1000     | 1        | 3.31                                    | 2.61        | 0.447 | -0.111 | 35.0         |
|         | 600      | 1        | 3.16                                    | 2.69        | 0.451 | -0.121 | 35.0         |
|         | 400      | 1        | 3.09                                    | 2.72        | 0.457 | -0.142 | 35.0         |
|         | 200      | 1        | 3.02                                    | 2.76        | 0.459 | -0.150 | 35.0         |
|         | 100      | 1        | 2.95                                    | 2.83        | 0.458 | -0.167 | 35.0         |

- The uncertainties of the parameters  $R_{\perp}$ ,  $\tau$ ,  $S_0$ , and  $A_{zz}$  were estimated in 5%, 2%, 5%, 0.005–0.02, and 0.3 G, respectively.
- The magnetic tensor components of DPPTC were  $g_{xx} = 2.0086$ ,  $g_{yy} = 2.0065$ ,  $g_{zz} = 2.0020$ , and  $A_{xx} = A_{yy} = 6.0$ .



**Table S4. Target masses from LC-MS measurement.**

| <b>Compound class</b>  | <b>Compound name</b>     | <b>Acronym</b>          | <b>Molecular formula</b>                                                        | <b>m/z [M-H]<sup>-</sup></b> |
|------------------------|--------------------------|-------------------------|---------------------------------------------------------------------------------|------------------------------|
| <i>Fatty acid</i>      | <b>Caprylic acid</b>     | C8:0                    | C <sub>8</sub> H <sub>16</sub> O <sub>2</sub>                                   | <b>143.1078</b>              |
| <i>Fatty acid</i>      | <b>Lauric acid</b>       | C12:0                   | C <sub>12</sub> H <sub>24</sub> O <sub>2</sub>                                  | <b>199.1704</b>              |
| <i>Fatty acid</i>      | <b>Myristic acid</b>     | C14:0                   | C <sub>14</sub> H <sub>28</sub> O <sub>2</sub>                                  | <b>227.2017</b>              |
| <i>Fatty acid</i>      | <b>Palmitic acid</b>     | C16:0                   | C <sub>16</sub> H <sub>32</sub> O <sub>2</sub>                                  | <b>255.233</b>               |
| <i>Fatty acid</i>      | <b>Stearic acid</b>      | C18:0                   | C <sub>18</sub> H <sub>36</sub> O <sub>2</sub>                                  | <b>283.2643</b>              |
| <i>Fatty acid</i>      | <b>Arachidic acid</b>    | C20:0                   | C <sub>20</sub> H <sub>40</sub> O <sub>2</sub>                                  | <b>311.2956</b>              |
| <b>CoA</b>             | <b>Coenzyme A (CoA)</b>  | CoA                     | C <sub>21</sub> H <sub>36</sub> N <sub>7</sub> O <sub>16</sub> P <sub>3</sub> S | <b>766.1079</b>              |
| <i>CoA derivatives</i> | <b>Acetyl-CoA</b>        | C2-CoA                  | C <sub>23</sub> H <sub>38</sub> N <sub>7</sub> O <sub>17</sub> P <sub>3</sub> S | <b>808.1185</b>              |
| <i>CoA derivatives</i> | <b>Octanoyl-CoA</b>      | Capryloyl-CoA(C8-CoA)   | C <sub>29</sub> H <sub>50</sub> N <sub>7</sub> O <sub>17</sub> P <sub>3</sub> S | <b>892.2124</b>              |
| <i>CoA derivatives</i> | <b>Dodecanoyl-CoA</b>    | Lauroyl-CoA(C12-CoA)    | C <sub>33</sub> H <sub>58</sub> N <sub>7</sub> O <sub>17</sub> P <sub>3</sub> S | <b>948.275</b>               |
| <i>CoA derivatives</i> | <b>Tetradecanoyl-CoA</b> | Myristoyl-CoA(C14-CoA)  | C <sub>35</sub> H <sub>62</sub> N <sub>7</sub> O <sub>17</sub> P <sub>3</sub> S | <b>976.3063</b>              |
| <i>CoA derivatives</i> | <b>Hexadecanoyl-CoA</b>  | Palmitoyl-CoA(C16-CoA)  | C <sub>37</sub> H <sub>66</sub> N <sub>7</sub> O <sub>17</sub> P <sub>3</sub> S | <b>1004.3376</b>             |
| <i>CoA derivatives</i> | <b>Octodecanoyl-CoA</b>  | Stearoyl-CoA(C18-CoA)   | C <sub>39</sub> H <sub>70</sub> N <sub>7</sub> O <sub>17</sub> P <sub>3</sub> S | <b>1032.3689</b>             |
| <i>CoA derivatives</i> | <b>Eicosanoyl-CoA</b>    | Arachidoyl-CoA(C20-CoA) | C <sub>41</sub> H <sub>74</sub> N <sub>7</sub> O <sub>17</sub> P <sub>3</sub> S | <b>1060.4002</b>             |
| <i>PIM2 products</i>   | <b>PIM2-Pal2</b>         | (Substrate)             | C <sub>53</sub> H <sub>99</sub> O <sub>23</sub> P                               | <b>1133.6242</b>             |
| <i>PIM2 products</i>   | <b>PIM2-Pal2-C2</b>      | (Product)               | C <sub>55</sub> H <sub>101</sub> O <sub>24</sub> P                              | <b>1175.6348</b>             |
| <i>PIM2 products</i>   | <b>PIM2-Pal2-C8</b>      | (Product)               | C <sub>61</sub> H <sub>113</sub> O <sub>24</sub> P                              | <b>1259.7287</b>             |
| <i>PIM2 products</i>   | <b>PIM2-Pal2-C12</b>     | (Product)               | C <sub>65</sub> H <sub>121</sub> O <sub>24</sub> P                              | <b>1315.7913</b>             |
| <i>PIM2 products</i>   | <b>PIM2-Pal2-C14</b>     | (Product)               | C <sub>67</sub> H <sub>125</sub> O <sub>24</sub> P                              | <b>1343.8226</b>             |
| <i>PIM2 products</i>   | <b>PIM2-Pal2-C16</b>     | (Product)               | C <sub>69</sub> H <sub>129</sub> O <sub>24</sub> P                              | <b>1371.8539</b>             |
| <i>PIM2 products</i>   | <b>PIM2-Pal2-C18</b>     | (Product)               | C <sub>71</sub> H <sub>133</sub> O <sub>24</sub> P                              | <b>1399.8852</b>             |
| <i>PIM2 products</i>   | <b>PIM2-Pal2-C20</b>     | (Product)               | C <sub>73</sub> H <sub>137</sub> O <sub>24</sub> P                              | <b>1427.9165</b>             |

**Table S5. Data collection and Refinement Statistics.**

| <b>PatA</b>                           |                                  |
|---------------------------------------|----------------------------------|
| <b>Wavelength</b>                     | 0.97625                          |
| <b>Resolution range</b>               | 40.65 - 3.67 (3.80 - 3.67)       |
| <b>Space group</b>                    | P 1 21 1                         |
| <b>Unit cell</b>                      | 81.31 92.97 81.09 90 90.33<br>90 |
| <b>Total reflections</b>              | 90742 (7983)                     |
| <b>Unique reflections</b>             | 13263 (1233)                     |
| <b>Multiplicity</b>                   | 6.8 (6.5)                        |
| <b>Completeness (%)</b>               | 99.07 (94.90)                    |
| <b>Mean I/sigma(I)</b>                | 9.96 (1.41)                      |
| <b>Wilson B-factor</b>                | 125.8                            |
| <b>R-merge</b>                        | 0.1792 (1.459)                   |
| <b>R-meas</b>                         | 0.194 (1.584)                    |
| <b>R-pim</b>                          | 0.07376 (0.6112)                 |
| <b>CC1/2</b>                          | 0.998 (0.7)                      |
| <b>CC*</b>                            | 0.999 (0.908)                    |
| <b>Reflections used in refinement</b> | 13216 (1229)                     |
| <b>Reflections used for R-free</b>    | 660 (62)                         |
| <b>R-work</b>                         | 0.2676 (0.3608)                  |
| <b>R-free</b>                         | 0.2837 (0.4449)                  |
| <b>CC(work)</b>                       | 0.936 (0.737)                    |
| <b>CC(free)</b>                       | 0.906 (0.580)                    |
| <b>Number of non-hydrogen atoms</b>   | 7126                             |
| <b>macromolecules</b>                 | 7120                             |
| <b>ligands</b>                        | 14                               |
| <b>Protein residues</b>               | 996                              |
| <b>RMS(bonds)</b>                     | 0.003                            |
| <b>RMS(angles)</b>                    | 0.79                             |
| <b>Ramachandran favored (%)</b>       | 98.08                            |
| <b>Ramachandran allowed (%)</b>       | 1.92                             |
| <b>Ramachandran outliers (%)</b>      | 0.00                             |
| <b>Rotamer outliers (%)</b>           | 0.00                             |
| <b>Clashscore</b>                     | 6.41                             |
| <b>Average B-factor</b>               | 124.55                           |
| <b>macromolecules</b>                 | 124.55                           |
| <b>ligands</b>                        | 118.29                           |

Statistics for the highest-resolution shell are shown in parentheses
